# Supplementary material for: Postmarketing surveillance on the clinical use of edoxaban in patients with nonvalvular atrial fibrillation (ETNA‐AF‐Japan): One‐year safety and effectiveness analyses
Source: PubMed Central journal article supplement (PMC7279995; doi:10.1002/joa3.12332), 2020-03-24

Supplement 2. Patient disposition of edoxaban administration

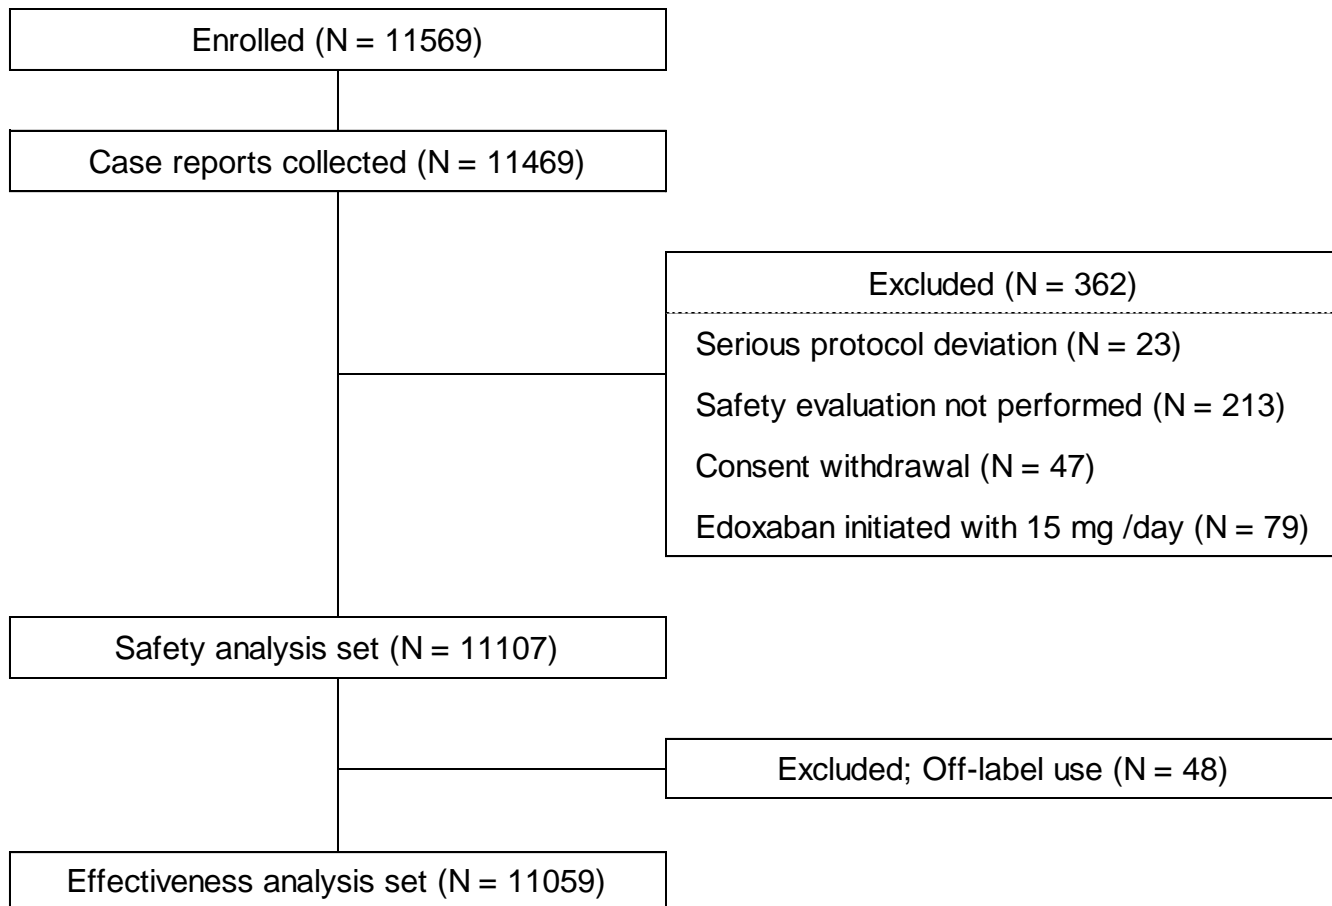

Supplement: JOA3-36-395-s002.pdf [file JOA3-36-395-s002.pdf]
