# Supplementary material for: Postmarketing surveillance on the clinical use of edoxaban in patients with nonvalvular atrial fibrillation (ETNA‐AF‐Japan): One‐year safety and effectiveness analyses
Source: PubMed Central journal article supplement (PMC7279995; doi:10.1002/joa3.12332), 2020-03-24
Supplement: JOA3-36-395-s003.pdf [file JOA3-36-395-s003.pdf]

### Supplement 3. Major bleeding events summary

Details of major bleeding events during the edoxaban treatment period in the safety analysis set (N=11107)

|                                                                     | Total<br>(N = 11107) | 60 mg<br>(N = 3066) | 30 mg<br>(N = 8041) |
|---------------------------------------------------------------------|----------------------|---------------------|---------------------|
| Total no. of patients, n (%)                                        | 120 (1.08)           | 22 (0.72)           | 98 (1.22)           |
| Total no. of events                                                 | 125                  | 23                  | 102                 |
| Neoplasms benign, malignant and unspecified (incl cysts and polyps) | 2 (0.02)             | 1 (0.03)            | 1 (0.01)            |
| Tumour haemorrhage                                                  | 2 (0.02)             | 1 (0.03)            | 1 (0.01)            |
| Blood and lymphatic system disorders                                | 2 (0.02)             | 0 (0.00)            | 2 (0.02)            |
| Anaemia                                                             | 1 (0.01)             | 0 (0.00)            | 1 (0.01)            |
| Iron deficiency anaemia                                             | 1 (0.01)             | 0 (0.00)            | 1 (0.01)            |
| Haemorrhagic diathesis                                              | 0 (0.00)             | 0 (0.00)            | 0 (0.00)            |
| Nervous system disorders                                            | 37 (0.33)            | 8 (0.26)            | 29 (0.36)           |
| Brain stem haemorrhage                                              | 1 (0.01)             | 0 (0.00)            | 1 (0.01)            |
| Cerebellar haemorrhage                                              | 6 (0.05)             | 1 (0.03)            | 5 (0.06)            |
| Cerebral haemorrhage                                                | 17 (0.15)            | 4 (0.13)            | 13 (0.16)           |
| Haemorrhage intracranial                                            | 1 (0.01)             | 0 (0.00)            | 1 (0.01)            |
| Subarachnoid haemorrhage                                            | 6 (0.05)             | 1 (0.03)            | 5 (0.06)            |
| Thalamus haemorrhage                                                | 3 (0.03)             | 1 (0.03)            | 2 (0.02)            |
| Putamen haemorrhage                                                 | 3 (0.03)             | 1 (0.03)            | 2 (0.02)            |
| Intracranial haematoma                                              | 1 (0.01)             | 0 (0.00)            | 1 (0.01)            |
| Eye disorders                                                       | 2 (0.02)             | 0 (0.00)            | 2 (0.02)            |
| Retinal haemorrhage                                                 | 2 (0.02)             | 0 (0.00)            | 2 (0.02)            |
| Cardiac disorders                                                   | 4 (0.04)             | 2 (0.07)            | 2 (0.02)            |
| Cardiac tamponade                                                   | 4 (0.04)             | 2 (0.07)            | 2 (0.02)            |
| Vascular disorders                                                  | 6 (0.05)             | 1 (0.03)            | 5 (0.06)            |
| Aortic aneurysm rupture                                             | 5 (0.05)             | 1 (0.03)            | 4 (0.05)            |
| Haematoma                                                           | 1 (0.01)             | 0 (0.00)            | 1 (0.01)            |
| Respiratory, thoracic and mediastinal disorders                     | 3 (0.03)             | 2 (0.07)            | 1 (0.01)            |
| Epistaxis                                                           | 1 (0.01)             | 1 (0.03)            | 0 (0.00)            |
| Pulmonary alveolar haemorrhage                                      | 2 (0.02)             | 1 (0.03)            | 1 (0.01)            |
| Gastrointestinal disorders                                          | 55 (0.50)            | 4 (0.13)            | 51 (0.63)           |
| Diverticulum intestinal haemorrhagic                                | 3 (0.03)             | 1 (0.03)            | 2 (0.02)            |
| Duodenal ulcer haemorrhage                                          | 1 (0.01)             | 0 (0.00)            | 1 (0.01)            |
| Faeces discoloured                                                  | 1 (0.01)             | 0 (0.00)            | 1 (0.01)            |
| Gastric haemorrhage                                                 | 8 (0.07)             | 1 (0.03)            | 7 (0.09)            |
| Gastric ulcer haemorrhage                                           | 3 (0.03)             | 0 (0.00)            | 3 (0.04)            |
| Gastritis haemorrhagic                                              | 1 (0.01)             | 0 (0.00)            | 1 (0.01)            |
| Gastrointestinal haemorrhage                                        | 21 (0.19)            | 2 (0.07)            | 19 (0.24)           |
| Haematochezia                                                       | 1 (0.01)             | 0 (0.00)            | 1 (0.01)            |
| Melaena                                                             | 3 (0.03)             | 0 (0.00)            | 3 (0.04)            |
| Rectal haemorrhage                                                  | 1 (0.01)             | 0 (0.00)            | 1 (0.01)            |
| Upper gastrointestinal haemorrhage                                  | 3 (0.03)             | 0 (0.00)            | 3 (0.04)            |
| Lower gastrointestinal haemorrhage                                  | 7 (0.06)             | 0 (0.00)            | 7 (0.09)            |
| Large intestinal haemorrhage                                        | 2 (0.02)             | 0 (0.00)            | 2 (0.02)            |

|                                                 | Total<br>(N = 11107) | 60 mg<br>(N = 3066) | 30 mg<br>(N = 8041) |
|-------------------------------------------------|----------------------|---------------------|---------------------|
| Small intestinal haemorrhage                    | 1 (0.01)             | 0 (0.00)            | 1 (0.01)            |
| Gastrointestinal angiectasia                    | 1 (0.01)             | 0 (0.00)            | 1 (0.01)            |
| Musculoskeletal and connective tissue disorders | 2 (0.02)             | 1 (0.03)            | 1 (0.01)            |
| Haemarthrosis                                   | 1 (0.01)             | 0 (0.00)            | 1 (0.01)            |
| Muscle haemorrhage                              | 1 (0.01)             | 1 (0.03)            | 0 (0.00)            |
| Renal and urinary disorders                     | 1 (0.01)             | 1 (0.03)            | 0 (0.00)            |
| Renal haemorrhage                               | 1 (0.01)             | 1 (0.03)            | 0 (0.00)            |
| Injury, poisoning and procedural complications  | 8 (0.07)             | 3 (0.10)            | 5 (0.06)            |
| Subdural haematoma                              | 5 (0.05)             | 2 (0.07)            | 3 (0.04)            |
| Subdural haemorrhage                            | 2 (0.02)             | 1 (0.03)            | 1 (0.01)            |
| Post procedural haemorrhage                     | 0 (0.00)             | 0 (0.00)            | 0 (0.00)            |
| Procedural haemorrhage                          | 1 (0.01)             | 0 (0.00)            | 1 (0.01)            |

System organ classes were used in the calculation of the number of patients with AEs, and preferred terms were used in the calculation of the number of AEs (MedDRA/J version 22.0).
